# Supplementary material
Source: Springer Nature journal article supplement (https://www.springermedizin.de/resource/supplementary/12913_2014_3499_MOESM2_ESM.pdf/9533006)

# The Be-Life program

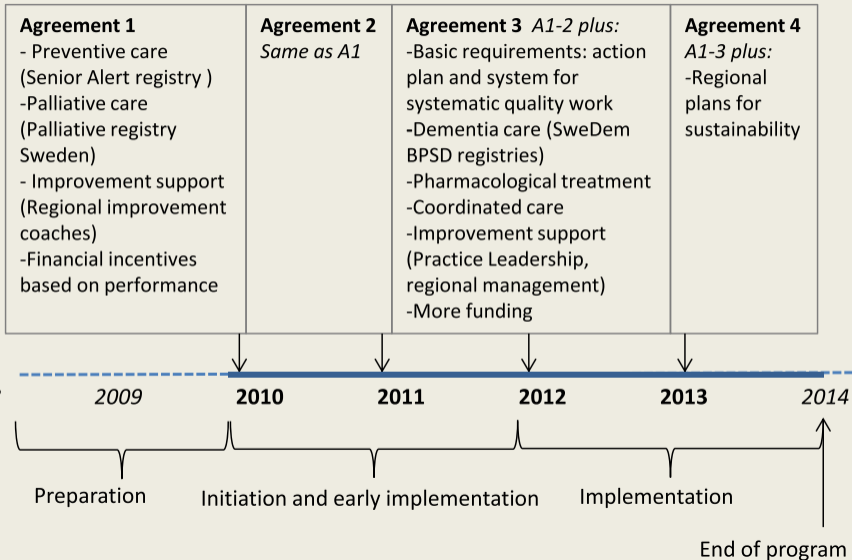

Supplement: MOESM2 [file 9533006]
